# Supplementary material for: Theoretical Studies on the Selectivity Mechanisms of Glycogen Synthase Kinase 3β (GSK3β) with Pyrazine ATP-competitive Inhibitors by 3D-QSAR, Molecular Docking, Molecular Dynamics Simulation and Free Energy Calculations
Source: PubMed Central journal article supplement — Curr Comput Aided Drug Des. 2020 Feb;16(1):17–30. doi: 10.2174/1573409915666190708102459 (PMC6967214; doi:10.2174/1573409915666190708102459), 2020-02
Supplement: CCADD-16-17_SD1.pdf [file CCADD-16-17_SD1.pdf]

## Supplementary Material

### Theoretical Studies on the Selectivity Mechanisms of Glycogen Synthase Kinase 3 $\beta$ (GSK3 $\beta$ ) with Pyrazine ATP-competitive inhibitors by 3D-QSAR, Molecular Docking, Molecular Dynamics Simulation and Free Energy Calculations

Jingyu Zhu,<sup>1,†,\*</sup> Yuanqing Wu,<sup>1,†</sup> Lei Xu,<sup>2</sup> Jian Jin,<sup>1,\*</sup>

<sup>1</sup>School of Pharmaceutical Sciences, Jiangnan University, Wuxi, Jiangsu 214122, P.R. China; <sup>2</sup>Institute of Bioinformatics and Medical Engineering, School of Electrical and Information Engineering, Jiangsu University of Technology, Changzhou213001, P.R. China

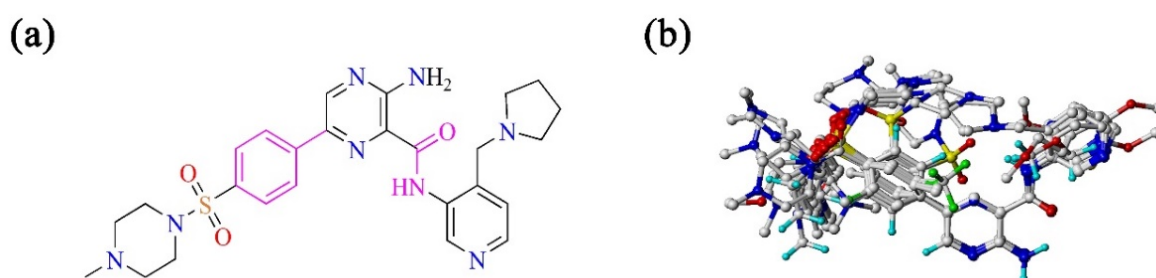

**Fig. (S1).** (a) the structure of the template molecule Cpd25; (b) a molecular overlay of all compounds based on a common backbone using Cpd25 as a template.

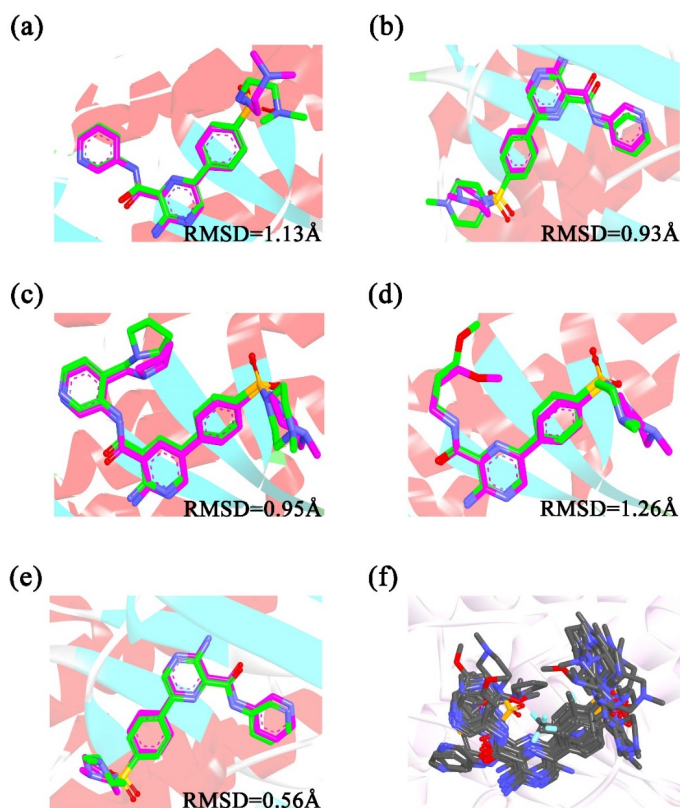

**Fig. (S2).** The overlap of the best docking results with the original ligands in the experimental crystal structure by CDOCKER (a) 4ACC/Cpd23; (b) 4ACD/Cpd18; (c) 4ACG/Cpd25; (d) 4ACH/Cpd51; the overlap of the best docking results with the original ligands in the experimental crystal structure by Flexible docking (e) 4ACD/Cpd18; (f) the Flexible docking conformational overlay of 31 compounds.

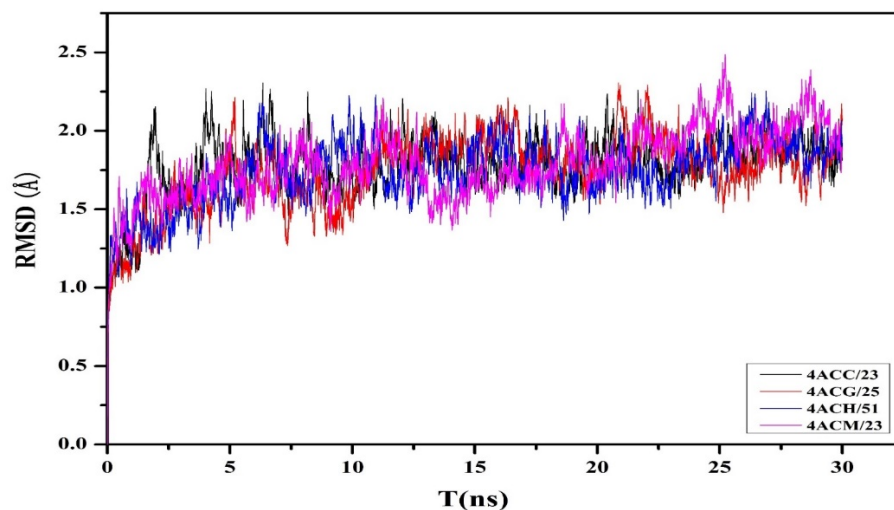

**Fig. (S3).** The root-mean-square deviations (RMSDs) of the four studied complexes.

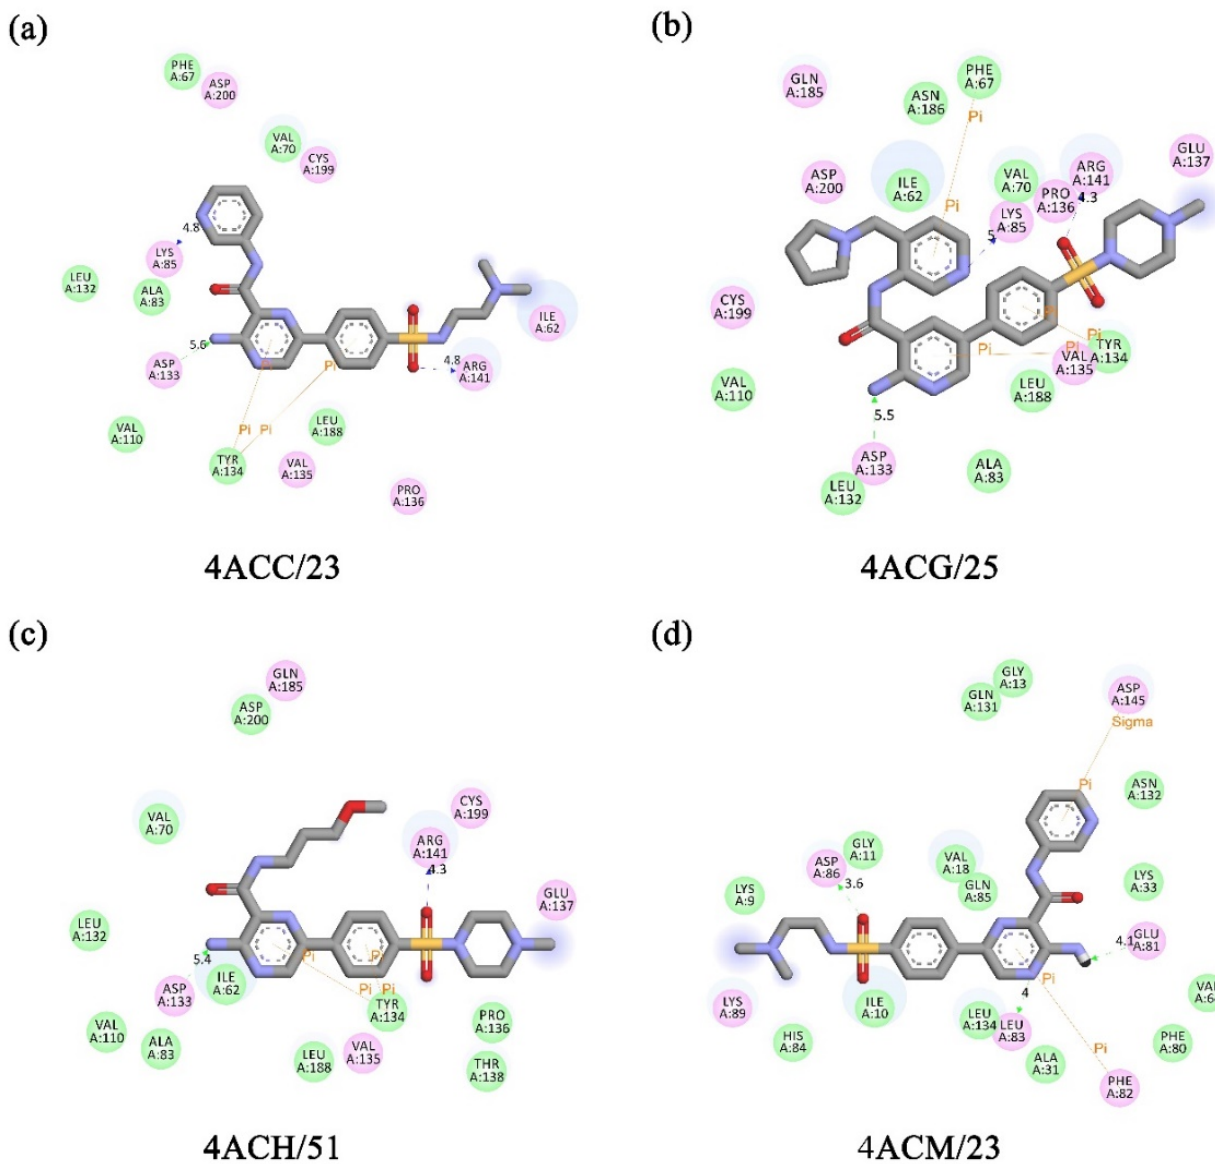

**Fig. (S4).** 2D presentations of the interactions between GSK3 $\beta$  and (a) Cpd23; (b) Cpd25; (c) Cpd51; (d) 2D presentations of the interactions between CDK2 and Cpd23.

Table S1. The predicted activities by CoMFA(1) model and the biological activity of the compounds

| No. | Actual pIC <sub>50</sub> | Pred pIC <sub>50</sub> | Res    |
|-----|--------------------------|------------------------|--------|
| 5   | 7.387                    | 7.457                  | 0.007  |
| 8   | 7.131                    | 7.020                  | 0.111  |
| 9   | 6.523                    | 6.482                  | 0.041  |
| 10  | 9.114                    | 9.151                  | -0.037 |
| 11  | 9.337                    | 9.324                  | 0.013  |
| 12  | 8.959                    | 8.907                  | 0.052  |
| 13  | 8.824                    | 8.801                  | 0.023  |
| 14  | 8.046                    | 8.334                  | -0.288 |
| 15  | 8.201                    | 8.203                  | -0.002 |
| 16  | 8.699                    | 8.651                  | 0.048  |
| *17 | 7.745                    | 7.729                  | 0.016  |
| *18 | 8.31                     | 8.465                  | -0.155 |
| *19 | 8.357                    | 9.051                  | -0.694 |
| 20  | 9.398                    | 9.078                  | 0.320  |
| 21  | 7.921                    | 7.967                  | -0.046 |
| 22  | 9.174                    | 9.456                  | -0.282 |
| *23 | 7.699                    | 8.021                  | 0.023  |
| *24 | 8.076                    | 8.546                  | 0.102  |
| 25  | 9.658                    | 9.539                  | 0.119  |
| 26  | 9.319                    | 9.238                  | 0.081  |
| 27  | 6.921                    | 7.140                  | -0.219 |
| 28  | 7.194                    | 7.225                  | -0.031 |
| 37  | 8.509                    | 8.617                  | -0.108 |
| 38  | 7.796                    | 7.784                  | 0.012  |
| 41  | 6.991                    | 6.782                  | -0.350 |
| 44  | 7.921                    | 7.899                  | 0.022  |
| 45  | 6.161                    | 6.002                  | 0.159  |
| 46  | 9.004                    | 8.903                  | 0.101  |
| 49  | 7.131                    | 6.799                  | 0.332  |
| *50 | 7.046                    | 6.300                  | 0.746  |
| *51 | 7.658                    | 6.311                  | 1.347  |

**Table S2. Structural alignment based on molecular docking statistical results of the CoMFA models.**

| CoMFA(1)                  |         | CoMFA(2) | CoMFA(3) | CoMFA(4) | CoMFA(5) |
|---------------------------|---------|----------|----------|----------|----------|
| $q^2$                     | 0.561   | 0.433    | 0.538    | 0.541    | 0.556    |
| $r^2$                     | 0.994   | 0.997    | 0.993    | 0.996    | 0.997    |
| SEE                       | 0.093   | 0.067    | 0.095    | 0.075    | 0.061    |
| F                         | 587.493 | 1146.750 | 708.881  | 1136.749 | 1749.453 |
| Components                | 5       | 5        | 4        | 4        | 4        |
| Steric                    | 1       |          |          | 0.271    |          |
| Electrostatic             | 0       |          |          | 0        |          |
| Steric (indicator)        |         |          | 1        |          | 0.347    |
| Electrostatic (indicator) |         |          | 0        |          | 0        |
| H-bond acceptor           |         | 0.671    |          | 0.471    | 0.406    |
| H-bond donor              |         | 0.329    |          | 0.258    | 0.247    |
| $r_{\text{test}}^2$       | 0.188   | 0.006    | 0.130    | 0.007    | 0.008    |
